# Supplementary material for: Favoring the generation and utilization of photocatalytic reactive species over g-C3N4 nanosheets by controllable edge C modification
Source: Royal Society of Chemistry journal article supplement (doi:10.1039/d2se01568d), 2022-12-28
Supplement: d2se01568d1.pdf [file d2se01568d1.pdf]

## Supporting Information

### Favoring photocatalytic reactive species generation and utilization over g-C<sub>3</sub>N<sub>4</sub> nanosheets by controllable edge C modification

Tingshuo Ji<sup>a,b,#</sup>, Yangyang Liu<sup>a,#</sup>, Peng Jin<sup>c</sup>, Xue Wei<sup>a,b</sup>, Xuotong Li<sup>a</sup>, Shouren Zhang<sup>a</sup>,  
Xuefeng Wei<sup>b,\*</sup>, Baocheng Yang<sup>a,\*</sup>, Yanzhen Guo<sup>a,\*</sup>

<sup>a</sup>Henan Provincial Key Laboratory of Nanocomposites and Applications, Institute of Nanostructured Functional Materials, Huanghe Science and Technology College, Zhengzhou 450006, China. E-mail: yzguo@hhstu.edu.cn; baochengyang@infm.hhstu.edu.cn

<sup>b</sup>College of Chemical Engineering & Pharmaceutics, Henan University of Science and Technology, Luoyang, 471023, PR China. E-mail: xfwei@haust.edu.cn

<sup>c</sup>State Key Laboratory of Coking Coal Exploitation and Comprehensive Utilization, China Pingmei Shenma Group, Pingdingshan 467000, China

#The authors contribute equally.

#### Density functional theory (DFT) calculations

The structural optimization was carried out by Vienna *Ab-initio* Simulation Package (VASP)<sup>S1</sup> with the projector augmented wave (PAW) method.<sup>S2</sup> The exchange-correlation functional was treated using the Perdew-Burke-Ernzerhof (PBE)<sup>S3</sup> functional in combination with the DFT-D3 correction.<sup>S4</sup> The cut-off energy of the plane-wave basis was set at 450 eV. For the optimization of both geometry and lattice size, the Brillouin zone integration is performed with 2×2×1 Monkhorst<sup>S5</sup> *k*-point sampling. The self-consistent calculations applied a convergence energy threshold of 10<sup>-5</sup> eV. The equilibrium geometries and lattice constants were optimized with maximum stress on each atom within 0.02 eV/Å. In calculation of band structure, high-symmetry points were obtained by vaspkit interface.<sup>S6,S7</sup>

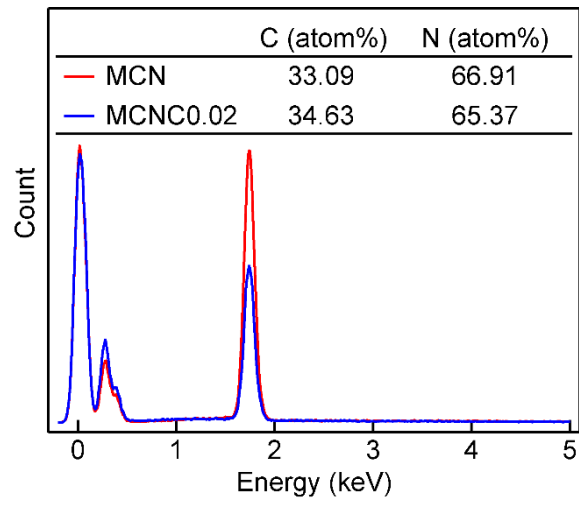

Fig. S1 The EDX spectra and element content of MCN and MCNC0.02.

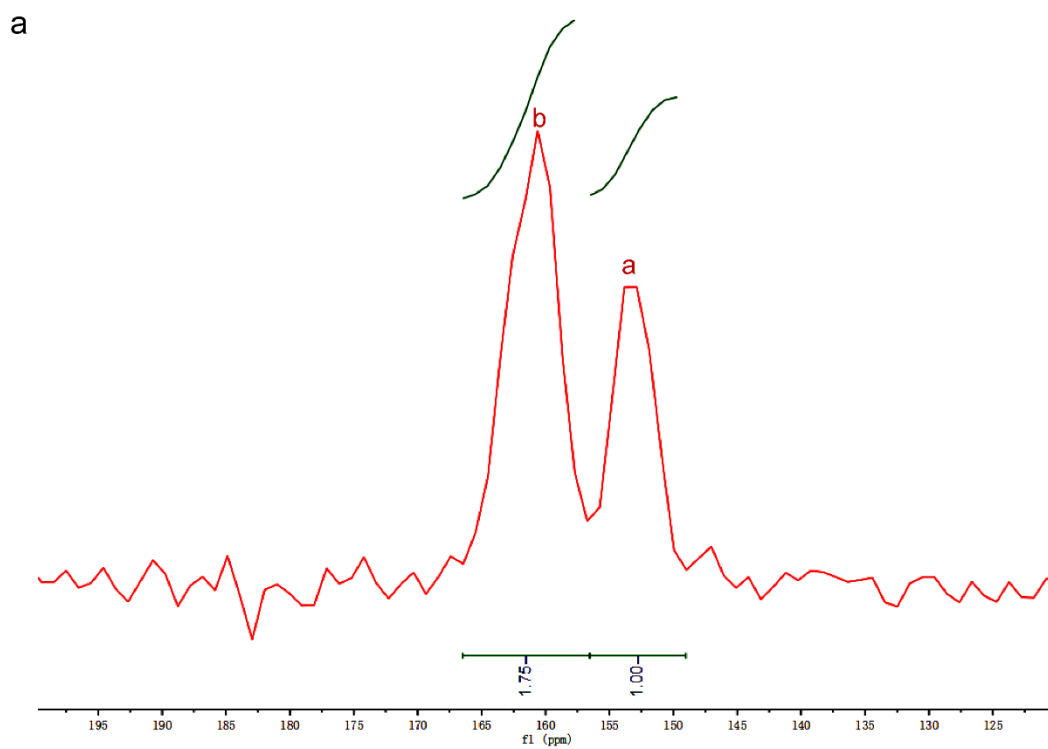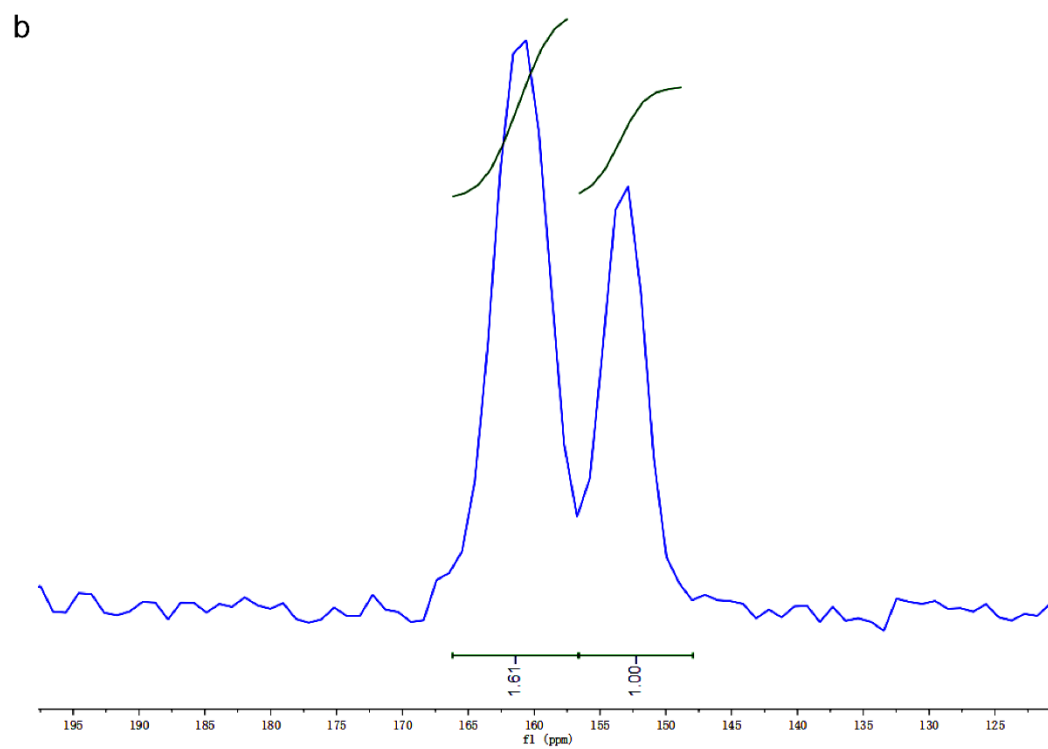

Fig. S2 The solid-state  $^{13}\text{C}$  NMR spectra of MCN (a) and MCNC0.02 (b).

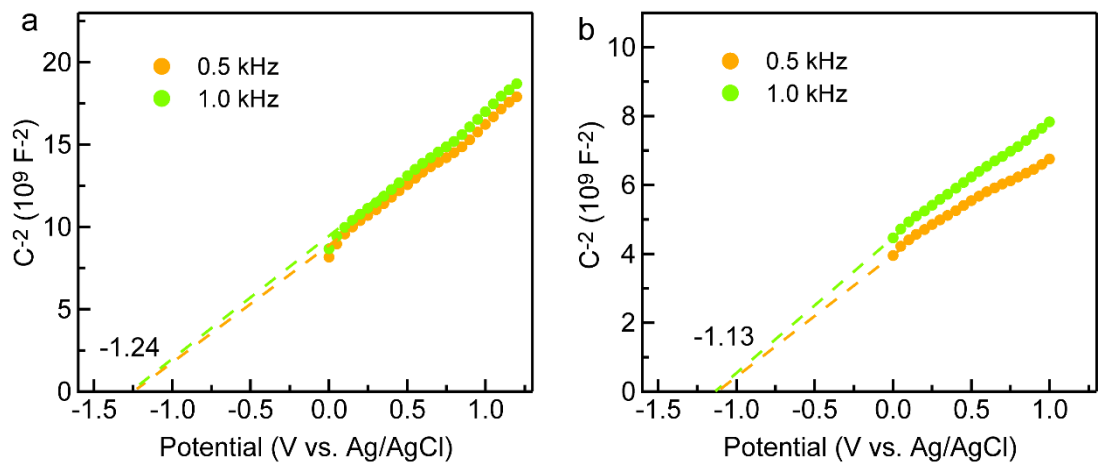

Fig. S3 The Mott–Schottky curves of MCN (a) and MCNC0.02 (b).

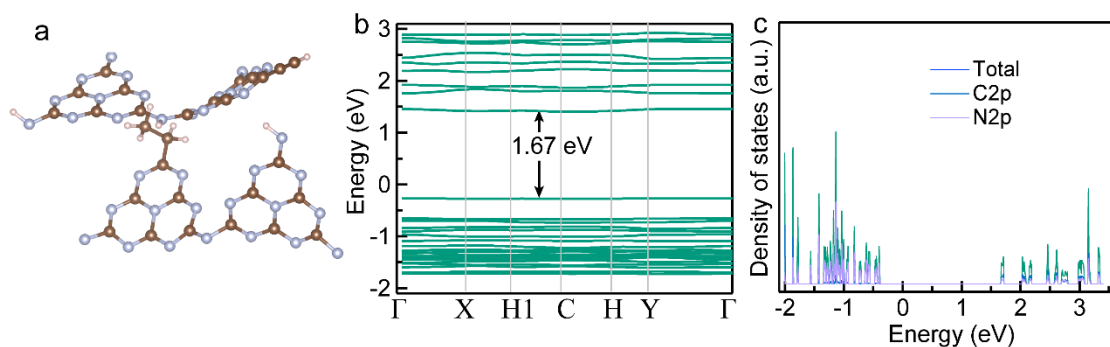

Fig. S4 DFT calculations of the methyl/acetonyl modified  $g\text{-C}_3\text{N}_4$ . (a) Structure model. (b) Band structure. (c) Density of states.

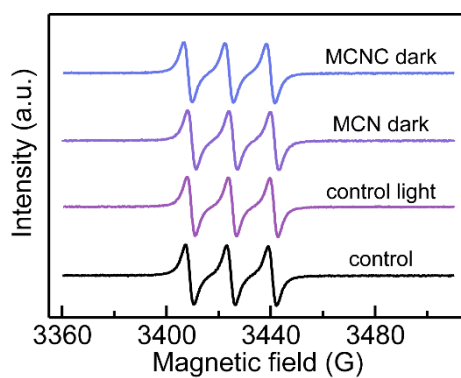

Fig. S5 EPR spectra of the control samples using TEMPO as the spinning probe.

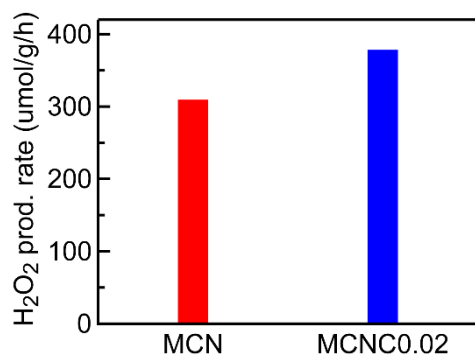

Fig. S6 Photocatalytic H<sub>2</sub>O<sub>2</sub> generation rate of MCN and MCNC0.02.

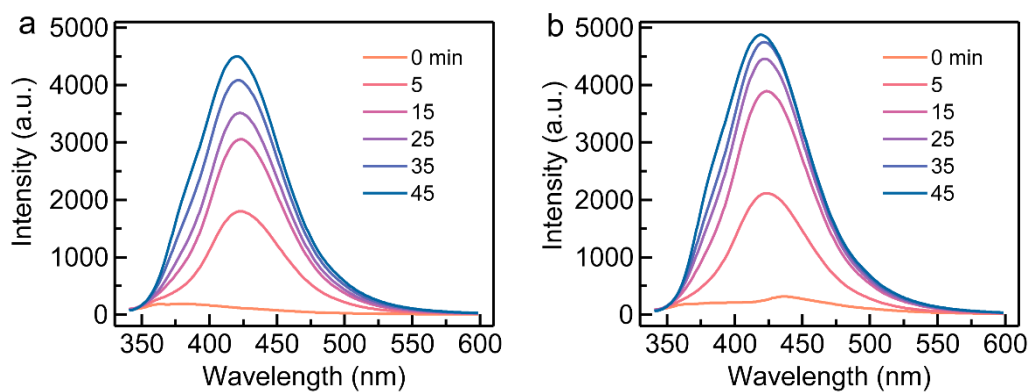

Fig. S7 Detection of •OH by using TA as a fluorescent probe. (a) MCN, (b) MCNC.

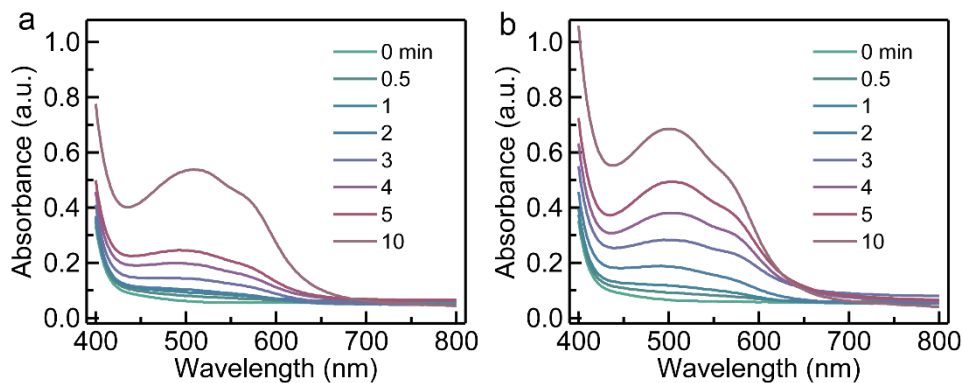

Fig. S8 Detection of •O<sub>2</sub><sup>-</sup> by using INT as a probe molecule. (a) MCN, (b) MCNC.

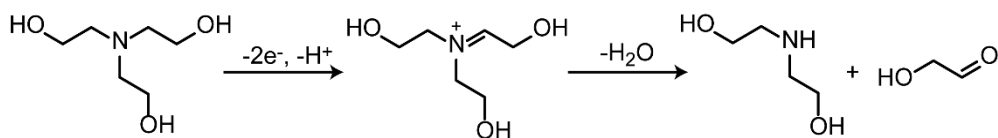

Fig. S9 The proposed oxidation path of TEOA according to previous reports.<sup>S8</sup>

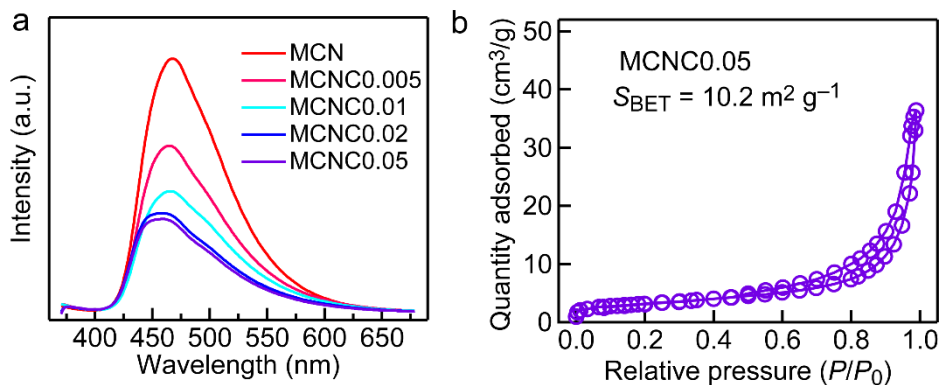

Fig. S10 The characterizations of the C-doped g-C<sub>3</sub>N<sub>4</sub> samples. (a) Steady-state PL spectra of the pristine and C-modified g-C<sub>3</sub>N<sub>4</sub> samples. (b) N<sub>2</sub> adsorption-desorption isothermal curve of MCNC0.05.

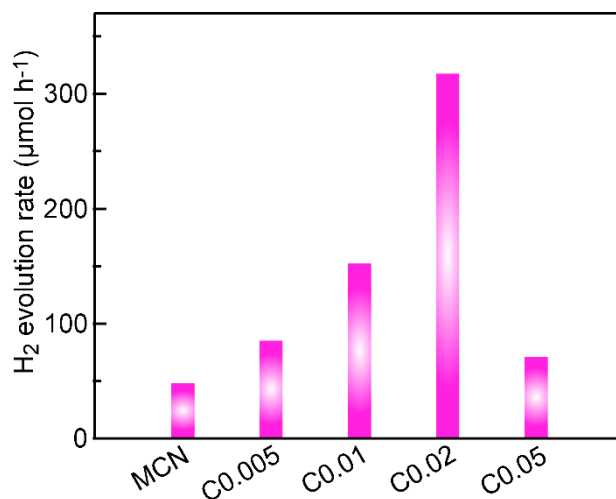

Fig. S11 Photocatalytic hydrogen evolution of the samples under white light irradiation.

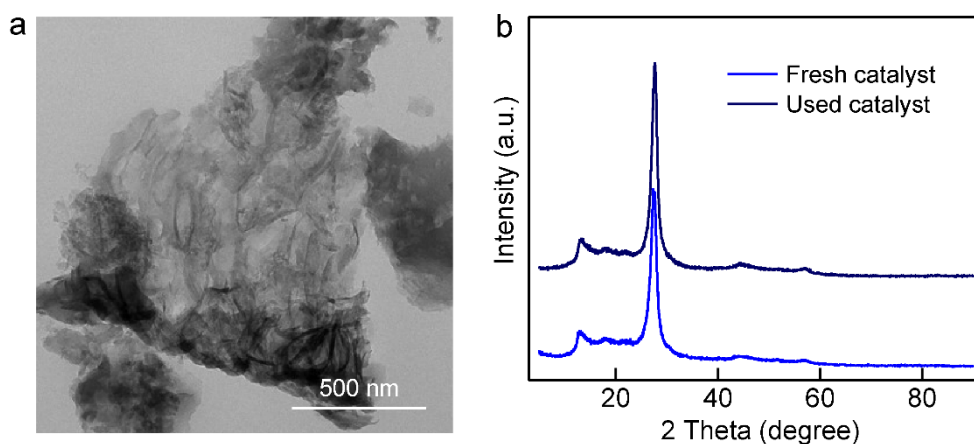

Fig. S12 The characterizations of the samples after stability test. (a) TEM image of MCNC0.02 after cyclic test. (b) XRD patterns of the fresh and used MCNC0.02 sample.

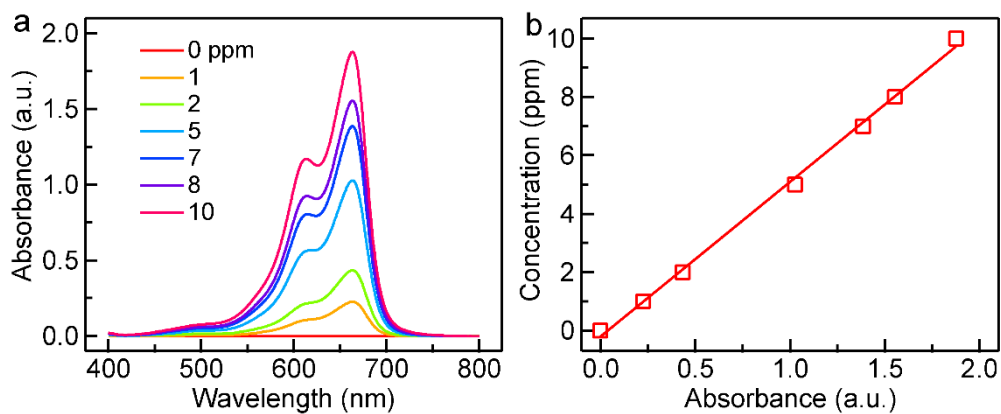

Fig. S13 The calibration curves for the measurement of MB concentration. (a) Absorbance curves of MB with different concentrations. (b) Calibration curve of MB by monitoring the wavelength at 664 nm.

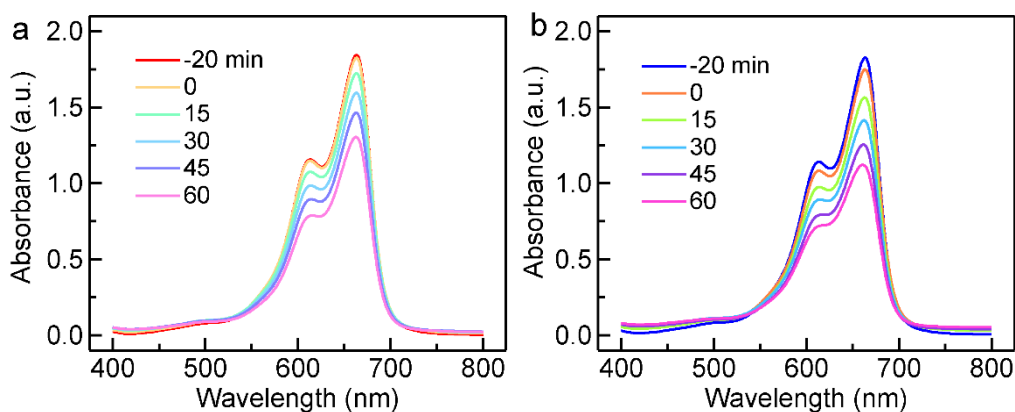

Fig. S14 The photocatalytic MB degradation of the samples under visible light ( $\lambda > 420$  nm) irradiation. (a) MCN. (b) MCNC0.02.

Table S1 Elemental analysis of the MCN and MCNC samples.

| Atomic ratio (%) | C     | N     |
|------------------|-------|-------|
| Samples          |       |       |
| MCN              | 32.13 | 67.87 |
| MCNC             | 34.92 | 65.08 |

Table S2 Comparison of the H<sub>2</sub> evolution rate and AQY values over some g-C<sub>3</sub>N<sub>4</sub>-based photocatalysts.

| Photocatalyst                                              | Light source                                    | Co-catalyst  | Sacrificial agent       | H <sub>2</sub> evolution rate (μmol g <sup>-1</sup> h <sup>-1</sup> ) | AQY                              | Ref. |
|------------------------------------------------------------|-------------------------------------------------|--------------|-------------------------|-----------------------------------------------------------------------|----------------------------------|------|
| g-C <sub>3</sub> N <sub>4</sub>                            | 300 W Xe lamp, λ > 420 nm                       | Pt (3.0 wt%) | TEOA (10 vol%)          | 106.9                                                                 | /                                | S9   |
| Polytriazine imide/Li <sup>+</sup> Cl <sup>-</sup>         | 300 W Xe lamp, λ > 300 nm                       | Pt (1.0 wt%) | Overall water splitting | 1890.0                                                                | ~6.0% at 380 nm                  | S10  |
| Triptycene incorporated g-C <sub>3</sub> N <sub>4</sub>    | 300 W Xe lamp, λ > 420 nm                       | Pt (1.0 wt%) | TEOA (10 vol%)          | 1618.0                                                                | 4.8% at 420 nm                   | S11  |
| C-incorporated g-C <sub>3</sub> N <sub>4</sub>             | 300 W Xe lamp, λ > 420 nm                       | Pt (0.5 wt%) | TEOA (15 vol%)          | 2500.0                                                                | /                                | S12  |
| C bridged g-C <sub>3</sub> N <sub>4</sub>                  | 300 W Xe lamp, λ > 420 nm                       | Pt (3.0 wt%) | TEOA (10 vol%)          | 529.0                                                                 | /                                | S13  |
| Holey C-doped g-C <sub>3</sub> N <sub>4</sub>              | Medium pressure mercury, λ > 400 nm             | Pt (3.0 wt%) | EDTA (10 vol%)          | 60.9                                                                  | 2.05% at 417 nm, 0.88% at 458 nm | S14  |
| Ascorbic acid modified g-C <sub>3</sub> N <sub>4</sub>     | 300 W Xe lamp, λ > 400 nm                       | Pt (1.0 wt%) | TEOA (10 vol%)          | 198.2                                                                 | /                                | S15  |
| C-doped g-C <sub>3</sub> N <sub>4</sub>                    | 500 W Xe lamp, AM 1.5G, 100 mW cm <sup>-2</sup> | Pt (1.0 wt%) | Methanol (10 vol%)      | 216.8                                                                 | /                                | S16  |
| C-doped g-C <sub>3</sub> N <sub>4</sub> @C, N co-doped ZnO | 500 W Xe lamp, AM 1.5G, 100 mW cm <sup>-2</sup> | Pt (1.0 wt%) | Methanol (10 vol%)      | 441.4                                                                 | /                                | S17  |
| C-incorporated g-C <sub>3</sub> N <sub>4</sub>             | 300 W Xe lamp, λ > 420 nm                       | Pt (3.0 wt%) | TEOA (10 vol%)          | 1003.9                                                                | /                                | S18  |
| Porous C-doped C <sub>3</sub> N <sub>4</sub>               | 300 W Xe lamp, λ > 420 nm                       | Pt (3.0 wt%) | TEOA (20 vol%)          | 1266.8                                                                | 10.1% at 420 nm                  | S19  |
| C self-doped                                               | 300 W Xe lamp                                   | Pt (3.0 wt%) | TEOA (10 vol%)          | 1224.0                                                                | /                                | S20  |



|                                                  |      |                            |              |                |         |   |                                                |  |  |           |
|--------------------------------------------------|------|----------------------------|--------------|----------------|---------|---|------------------------------------------------|--|--|-----------|
| g-C <sub>3</sub> N <sub>4</sub>                  |      | lamp, $\lambda >$          | wt%)         | vol%)          |         |   |                                                |  |  |           |
|                                                  |      | 400 nm                     |              |                |         |   |                                                |  |  |           |
| C-enriched porous C <sub>3</sub> N <sub>4</sub>  | g-   | 300 W Xe lamp, $\lambda >$ | Pt (3.0 wt%) | TEOA (10 vol%) | 2352.0  | / |                                                |  |  | S21       |
|                                                  |      | 420 nm                     |              |                |         |   |                                                |  |  |           |
| Broom-like O-doped C <sub>3</sub> N <sub>4</sub> | g-   | 300 W Xe lamp, $\lambda >$ | Pt (3.0 wt%) | TEOA (10 vol%) | 13610.0 | / |                                                |  |  | S22       |
|                                                  |      | 420 nm                     |              |                |         |   |                                                |  |  |           |
| Edge modified C <sub>3</sub> N <sub>4</sub>      | C-g- | 300 W Xe lamp, $\lambda >$ | Pt (3.0 wt%) | TEOA (10 vol%) | 626.0   |   | 5.0% at 380 nm, 1.9% at 420 nm, 1.1% at 450 nm |  |  | This work |

## Reference

- S1 J. Hafner, *J. Comput. Chem.*, 2008, **29**, 2044–2078.
- S2 P. E. Blöchl, *Phys. Rev. B*, 1994, **50**, 17953.
- S3 J. P. Perdew, K. Burke, M. Ernzerhof, *Phys. Rev. Lett.*, 1996, **77**, 3865.
- S4 S. Grimme, *J. Comput. Chem.*, 2006, **27**, 1787–1799.
- S5 H. J. Monkhorst, J. D. Pack., *Phys. Rev. B*, 1976, **13**, 5188.
- S6 V. Wang, N. Xu, J.-C. Liu, G. Tang, W.-T. Geng, *Comput. Phys. Commun.*, 2021, **267**, 108033.
- S7 V. Wang, G. Tang, R.-T. Wang, Y.-C. Liu, H. Mizuseki, Y. Kawazoe, J. Nara, W.-T. Geng, arXiv:1806.04285.
- S8 O. Savateev, Y. J. Zou, *ChemistryOpen*, 2022, **11**, e202200095.
- S9 X. C. Wang, K. Maeda, A. Thomas, K. Takanabe, G. Xin, J. M. Carlsson, K. Domen, M. Antonietti, *Nat. Mater.*, 2009, **8**, 76–80.
- S10 L. H. Lin, Z. Y. Lin, J. Zhang, X. Cai, W. Lin, Z. Y. Yu, X. C. Wang, *Nat. Catal.*, 2020, **3**, 649–655.
- S11 Y. Zheng, L. L. Zhan, Y. K. Li, Y. Y. Wang, J. L. Chen, B. Z. Lin, Y. Z. Zheng, Cheng, S. B. Wang, Y. L. Chen, *J. Colloid Interface Sci.*, 2022, **622**, 675–689.
- S12 J. Li, D. D. Wu, J. Iocozzia, H. W. Du, X. Q. Liu, Y. P. Yuan, W. Zhou, Z. Li, Z. M. Xue, Z. Q. Lin, *Angew. Chem. Int. Ed.*, 2019, **58**, 1985–1989.

- S13 H. L. Li, F. P. Li, Z. Y. Wang, Y. C. Jiao, Y. Y. Liu, P. Wang, X. Y. Zhang, X. Y. Qin, Y. Dai, B. B. Huang, *Appl. Catal., B*, 2018, **229**, 114–120.
- S14 E. S. D. Silva, N. M. M. Moura, A. Coutinho, G. Dražić, B. M. S. Teixeira, N. A. Sobolev, C. G. Silva, M. G. P. M. S. Neves, M. Prieto, J. L. Faria, *ChemSusChem*, 2018, **11**, 2681–2694.
- S15 R. C. Pawar, S. Kang, H. Han, H. Choi, C. S. Lee, *Catal. Sci. Technol.*, 2019, **9**, 1004–1012.
- S16 M. A. Mohamed, M.F. M. Zain, L. J. Minggu, M. B. Kassim, J. Jaafar, N. A. S. Amin, Z. A. M. Hir, M. S. Rosmi, *Int. J. Hydrogen Energy*, 2019, **44**, 13098–13105.
- S17 M. A. Mohamed, M.F. M. Zain, L. J. Minggu, M. B. Kassim, J. Jaafar, N. Aishah S. Amine, M. S. Mastuli, H. Wu, R. J. Wong, Y. H. Ng, *J. Ind. Eng. Chem.*, 2019, **77**, 393–407.
- S18 Y. Y. Huang, D. Li, Z. Y. Fang, R. J. Chen, B. F. Luo, W. D. Shi, *Appl. Catal., B*, 2019, **254**, 128–134.
- S19 Y. B. Jiang, Z. G. Lin, Y. Y. Zhang, Y. C. Lai, D. Liang, C. Z. Yang, *New J. Chem.*, 2020, **44**, 17891–17898.
- S20 E. L. Liu, X. Lin, Y. Z. Hong, L. Yang, B. F. Luo, W. L. Shi, J. Y. Shi, *Renewable Energy*, 2021, **178**, 757–765.
- S21 J. Q. Wen, Y. W. Wang, H. Zhao, M. Zhang, S. Y. Zhang, Y. G. Liu, Y. P. Zhai, *New J. Chem.*, 2022, **46**, 4647–4653.
- S22 Y. R. Shang, Y. Wang, C. D. Lv, F. Y. Jing, T. X. Liu, W. L. Li, S. S. Liu, G. Chen, *Chem. Eng. J.*, 2022, **431**, 133898.
